# Supplementary material for: Inhibitors of Lipoxygenase and Cyclooxygenase-2 Attenuate Trimethyltin-Induced Neurotoxicity through Regulating Oxidative Stress and Pro-Inflammatory Cytokines in Human Neuroblastoma SH-SY5Y Cells
Source: MDPI journal article supplement (doi:10.3390/brainsci11091116), 2021-08-24
Supplement: s1 [file s1]

Supplemental  
Figure S1

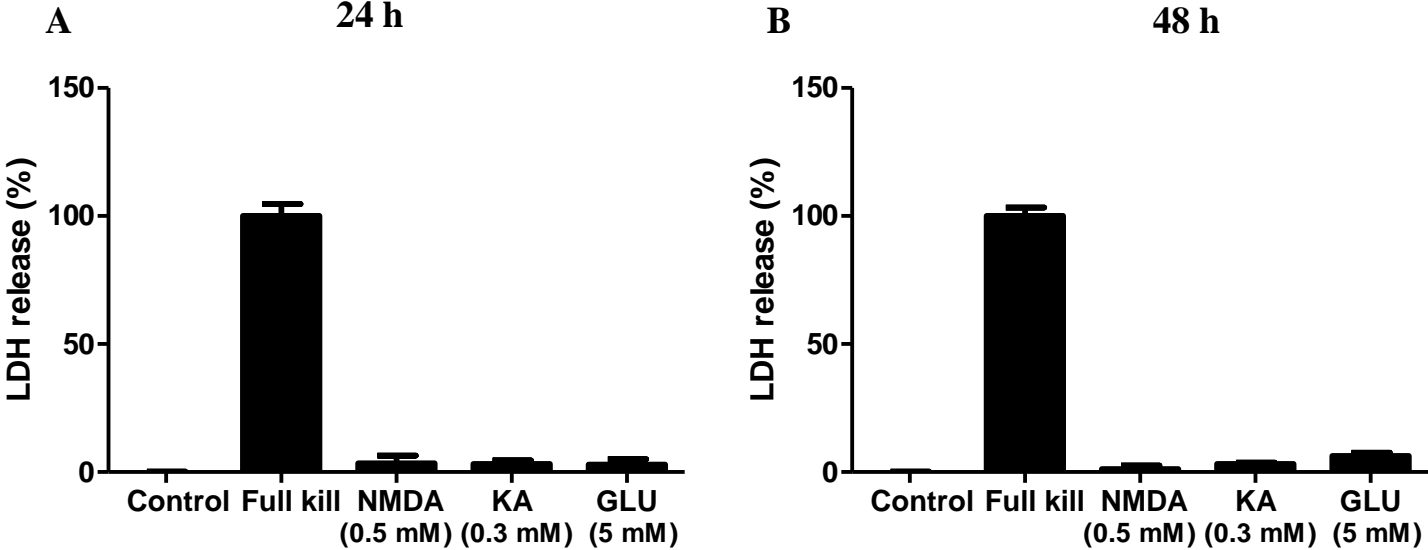

## Supplemental Figure S2

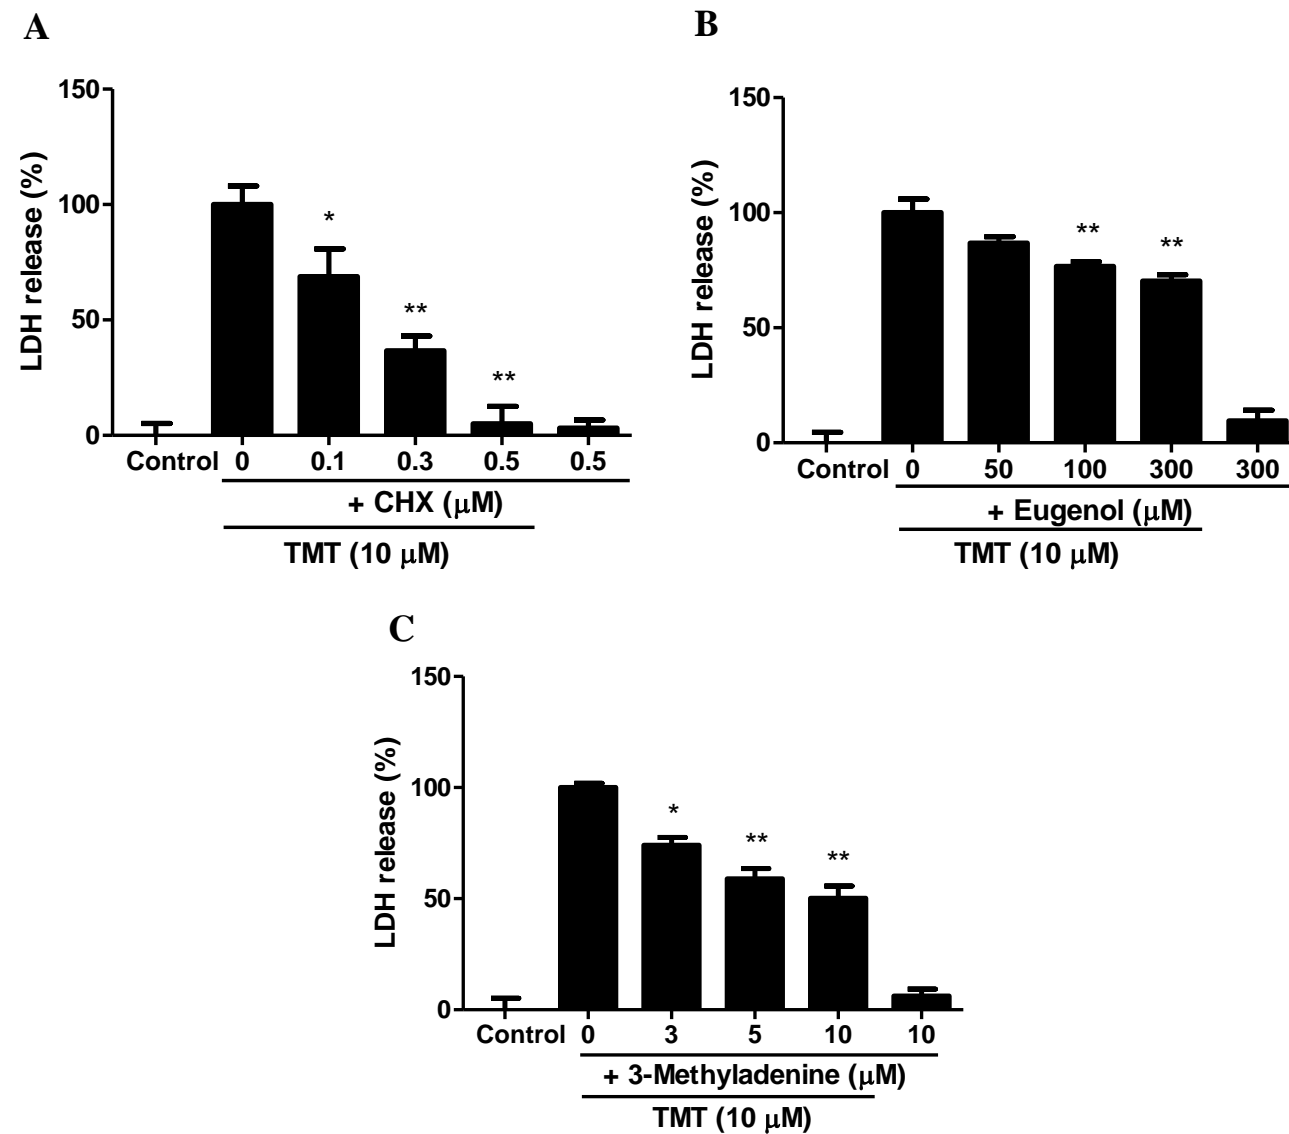

Supplemental  
Figure S3

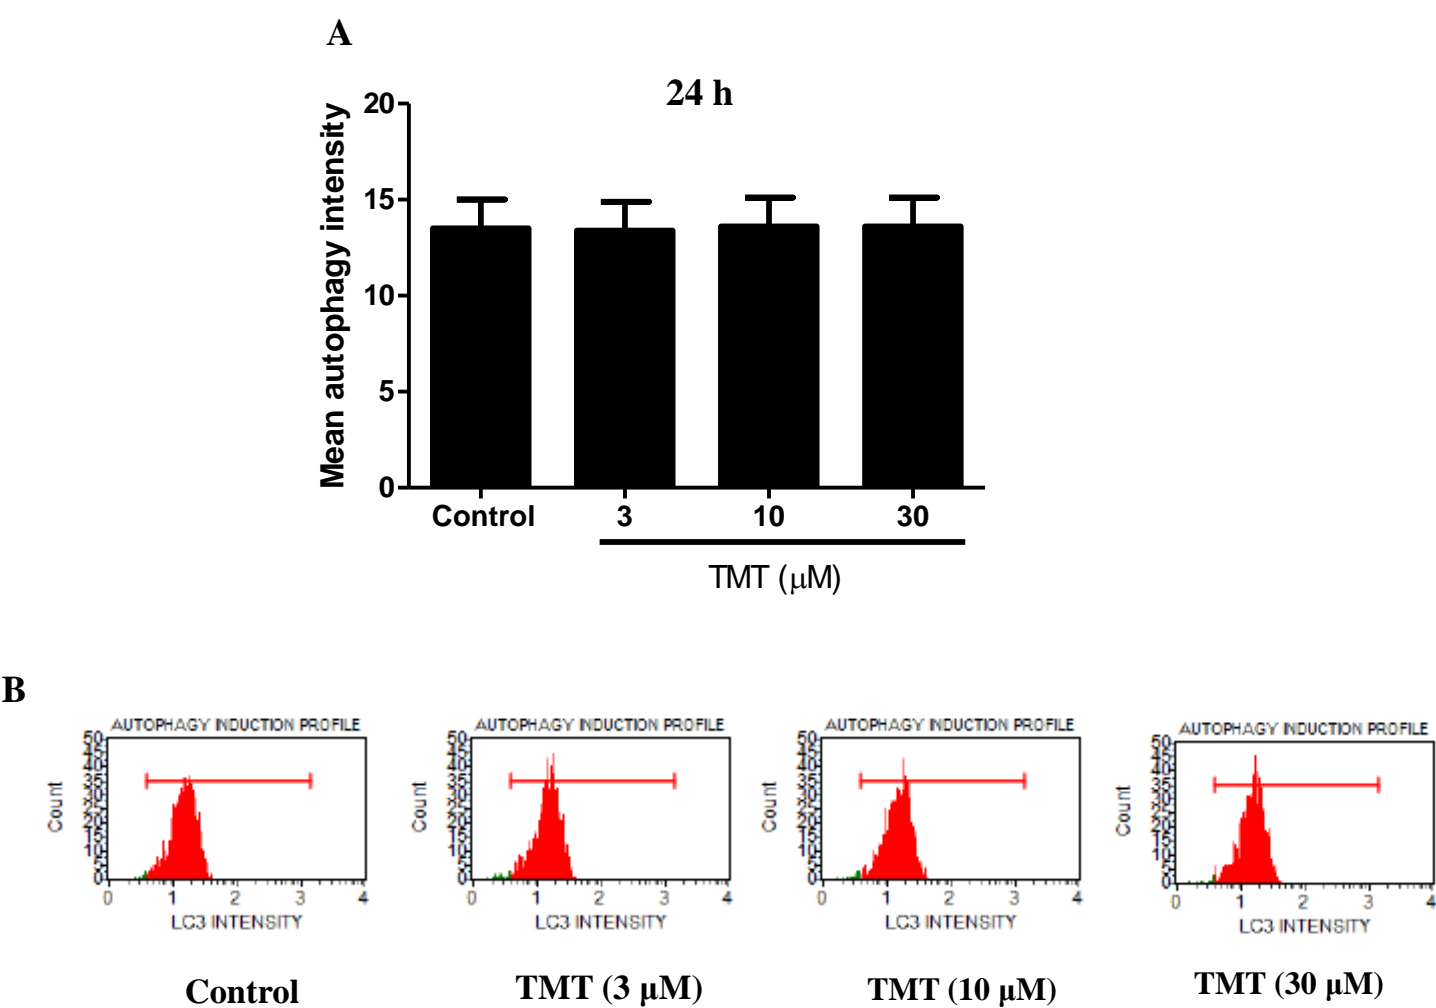

Supplemental  
Figure S4

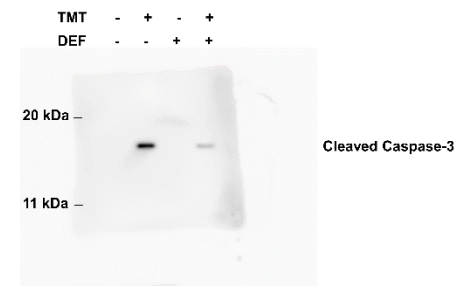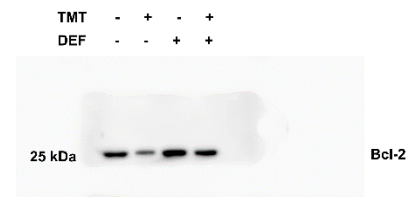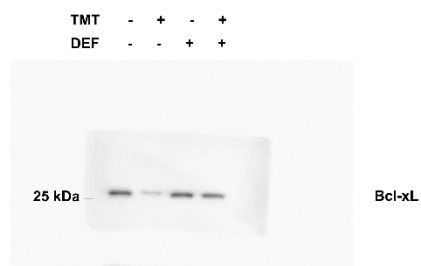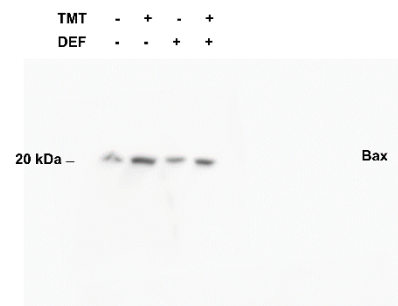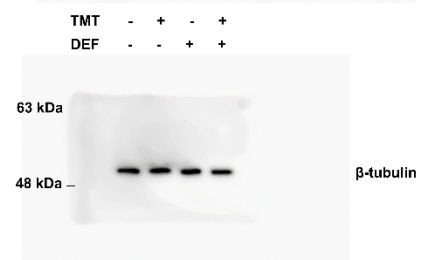

## Legends of supplemental Figures

Figure S1. Excitotoxicity induced by NMDA (0.5 mM), KA (0.3 mM), and glutamate (5 mM) was not present at 24 h and 48 h after TMT treatment in SH-SY5Y cells. Cytotoxicity was evaluated using a LDH release assay. Data represents the mean  $\pm$  SEM. Experiments were performed at least three times, with similar results.

Figure S2. New protein synthesis inhibitor, cycloheximide (CHX), phenylpropanoid compound of clove oil, eugenol and autophagy inhibitor, 3-methyladenine attenuate TMT-induced toxicity in SH-SY5Y cells. Data represents the mean  $\pm$  SEM. \* $p$ <0.05 and \*\* $p$ <0.01 compared to 10-  $\mu$ M TMT-treated group (n=4). Experiments were performed at least three times, with similar results.

Figure S3. Effects of TMT on autophagic LC3 intensity in SH-SY5Y cells. Mean autophagy intensity did not alter at the 3, 10, 30  $\mu$ M concentration of TMT at 24 h (A). Representative flow cytometry data showed in B. Data represents the mean  $\pm$  SEM. Experiments were performed at least three times, with similar results.

Figure S4. Whole western blot photos of cleaved caspase-3, Bcl-2, Bcl-xL, and Bax assays induced by 10  $\mu$ M TMT with or without 100  $\mu$ M deferoxamine in SH-SY5Y cells.  $\beta$ -tubulin was used as a control. DEF : deferoxamine.
